# Supplementary material
Source: PubMed Central journal article supplement (PMC8917823)

Supplemental Fig. 1

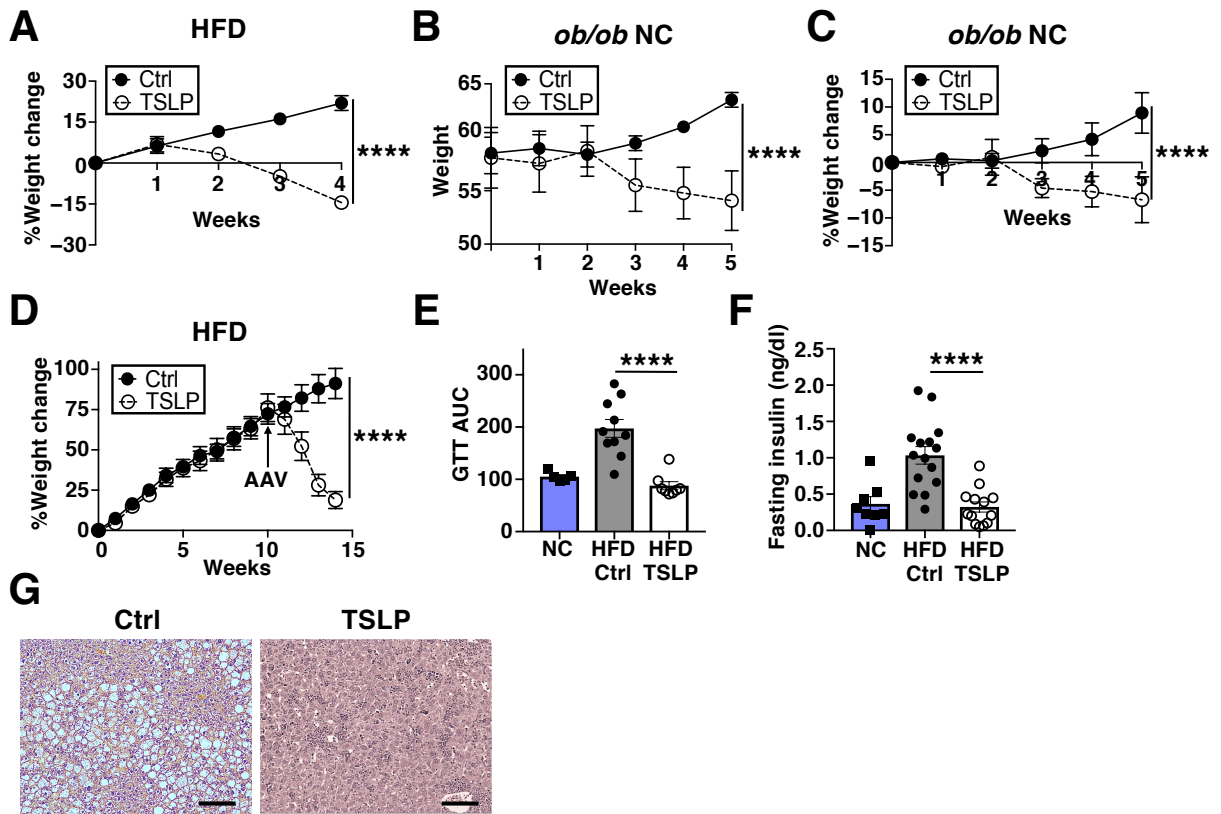

Supplemental Fig. 2

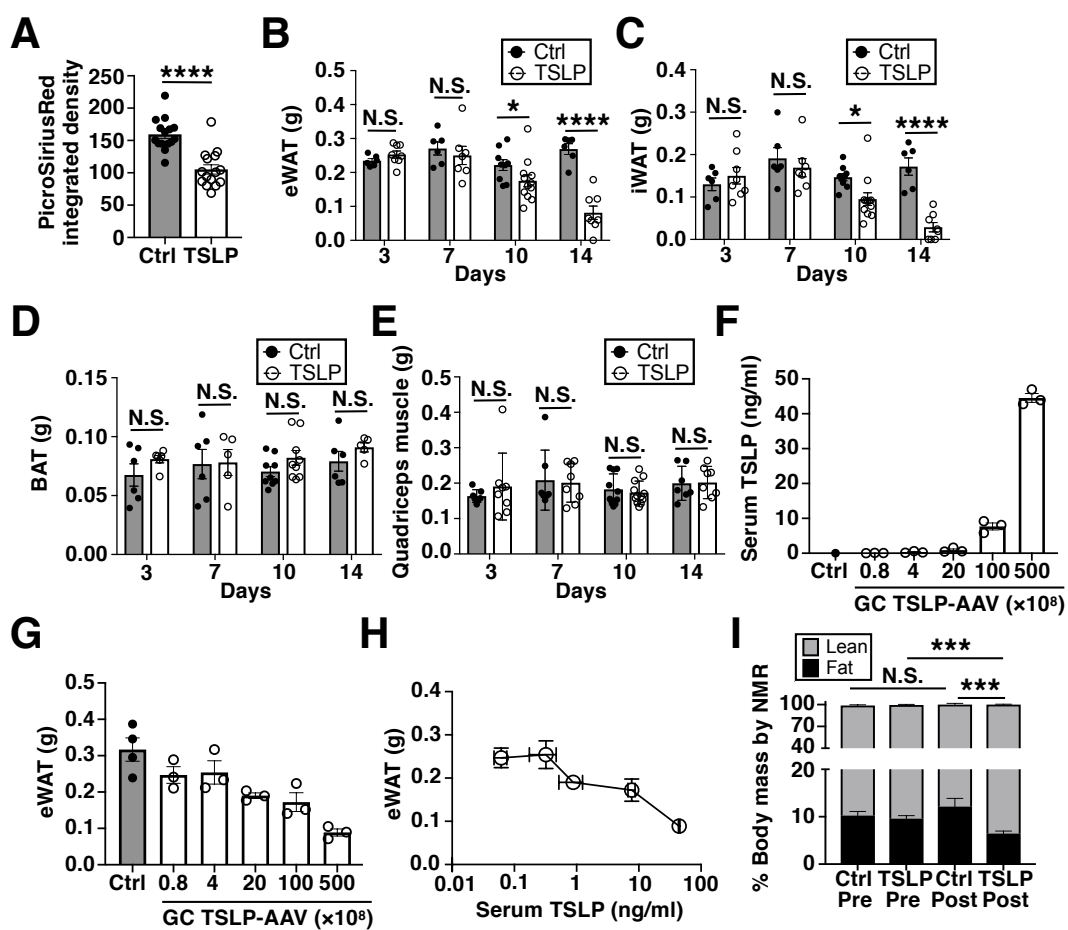

# Supplemental Fig. 3

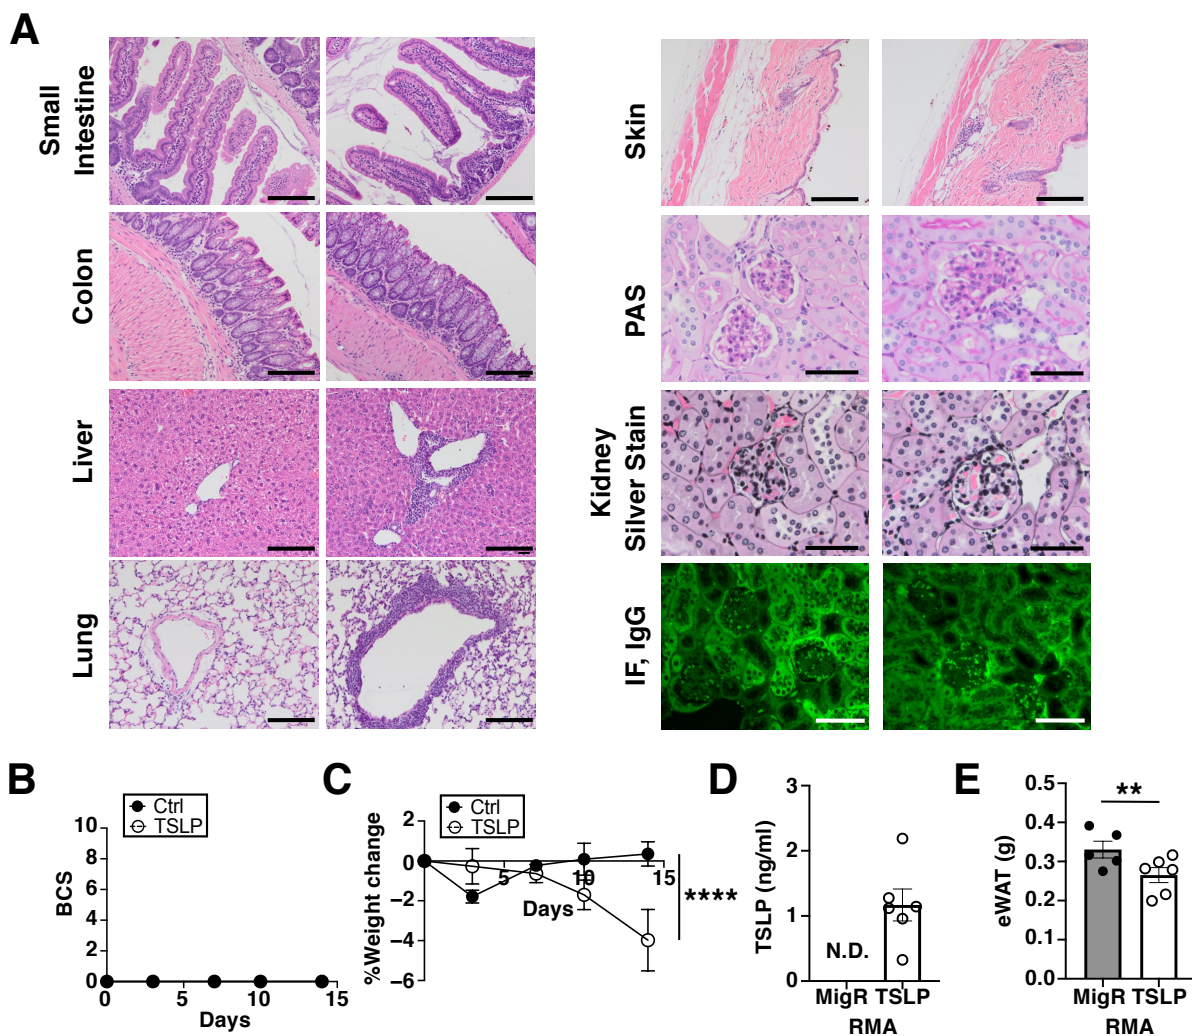

Supplemental Fig. 4

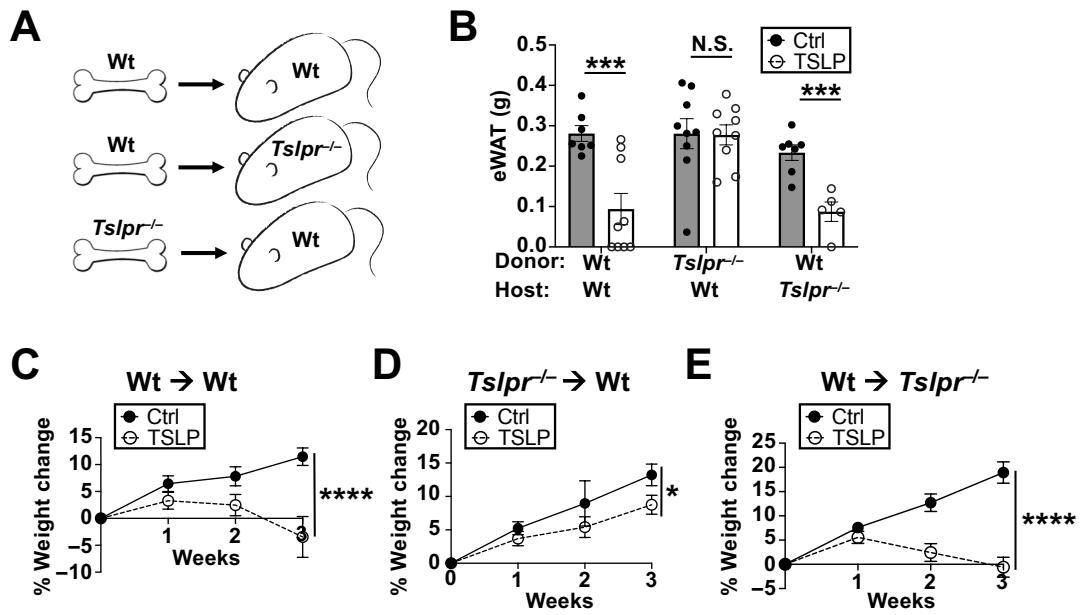



## Supplemental Fig. 5

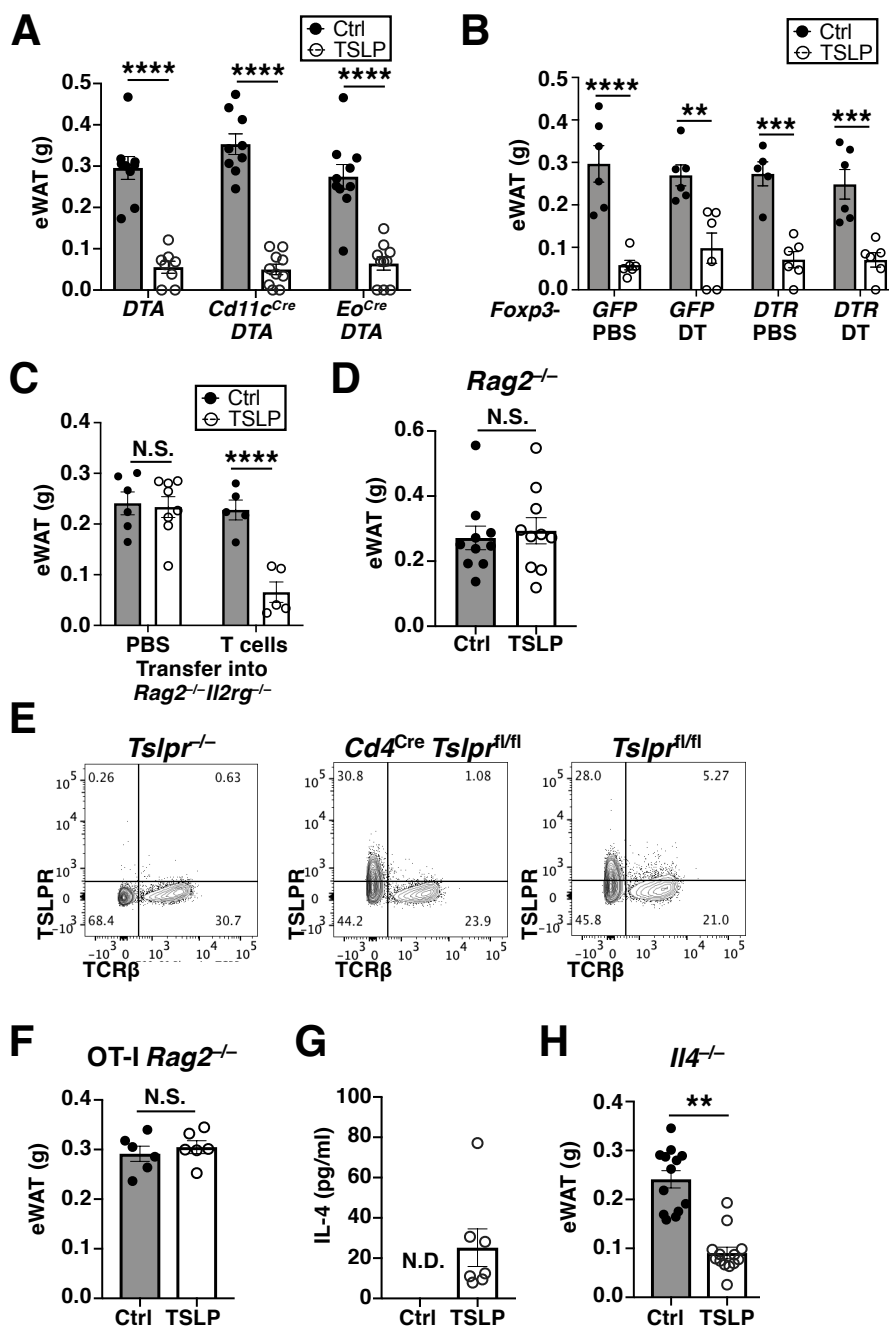

Supplementary Fig. 6

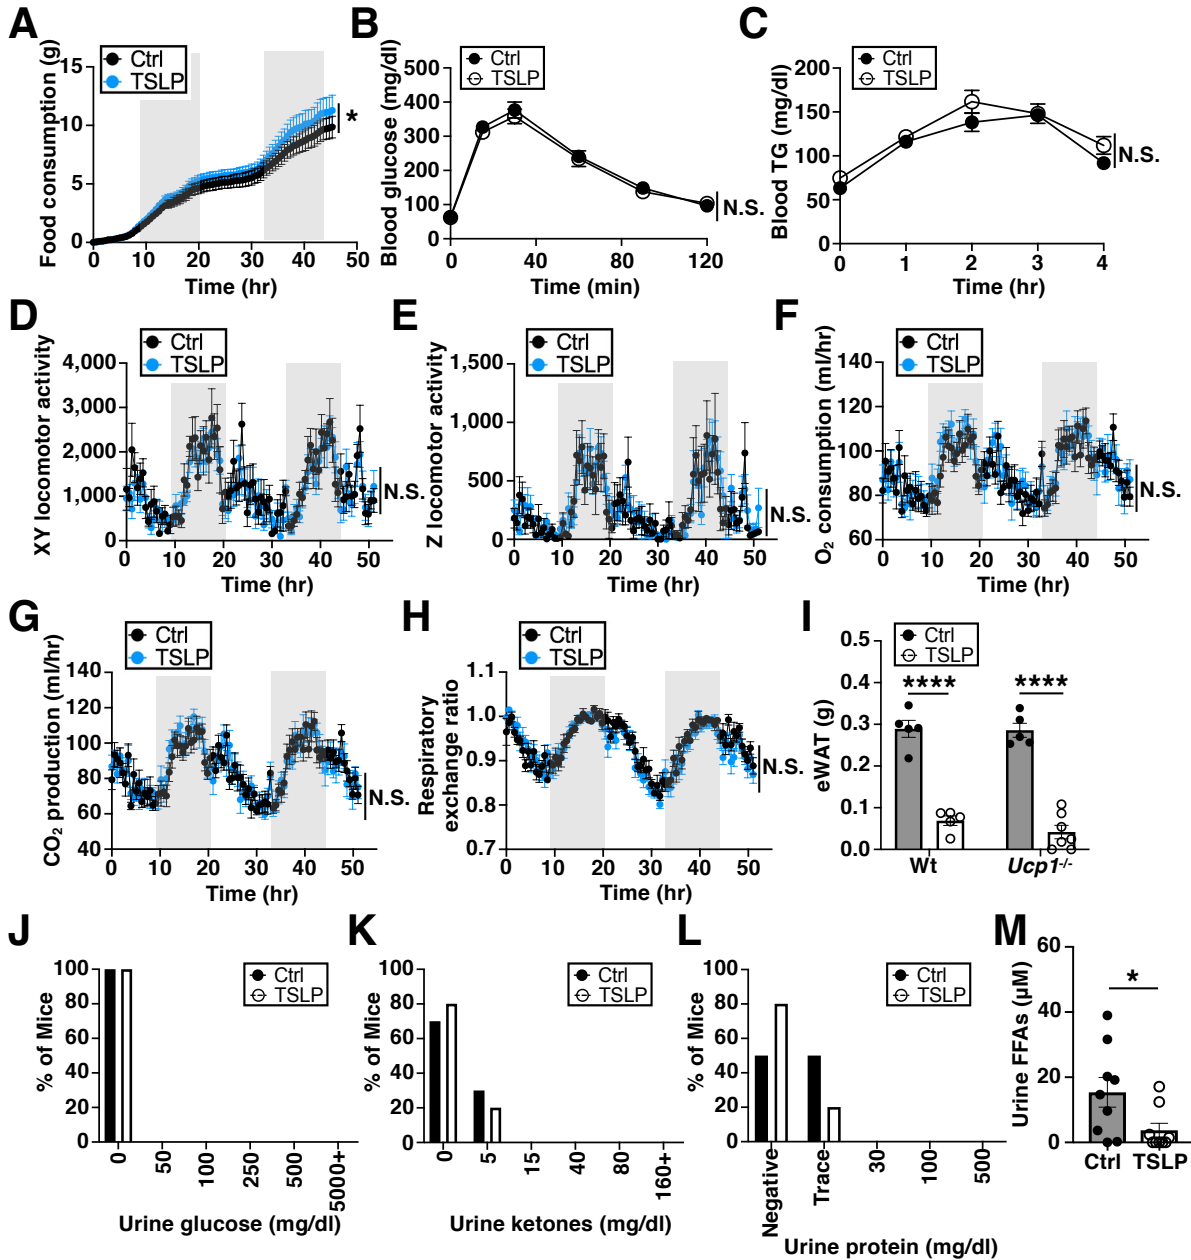



Supplemental Fig. 8

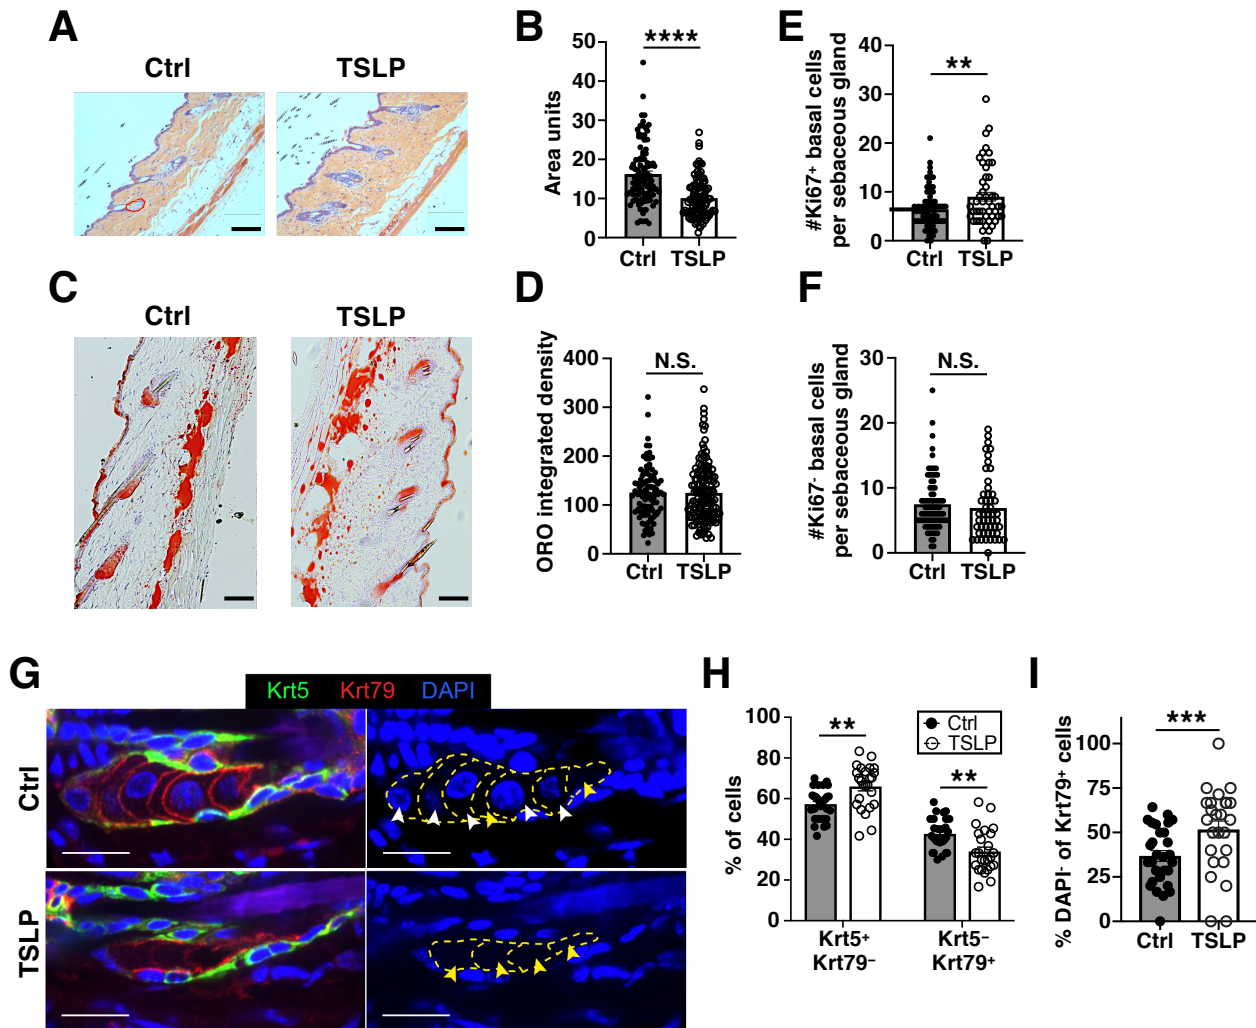

# Supplemental Fig. 9

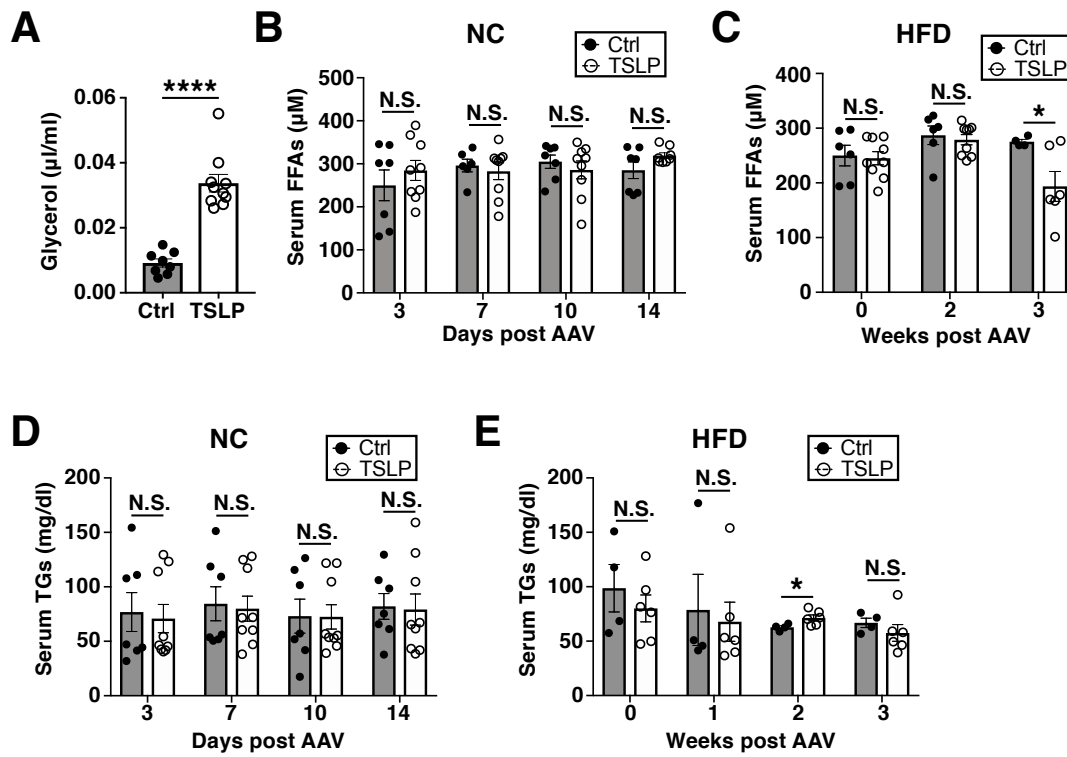

Supplemental Fig. 10

**A**

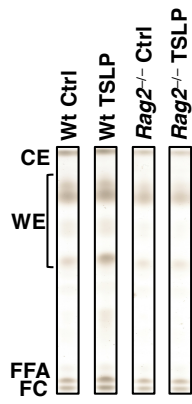

**B**

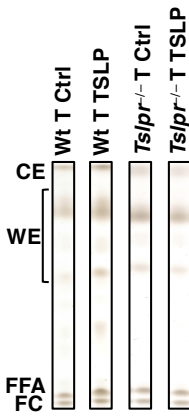

Supplemental Fig. 11

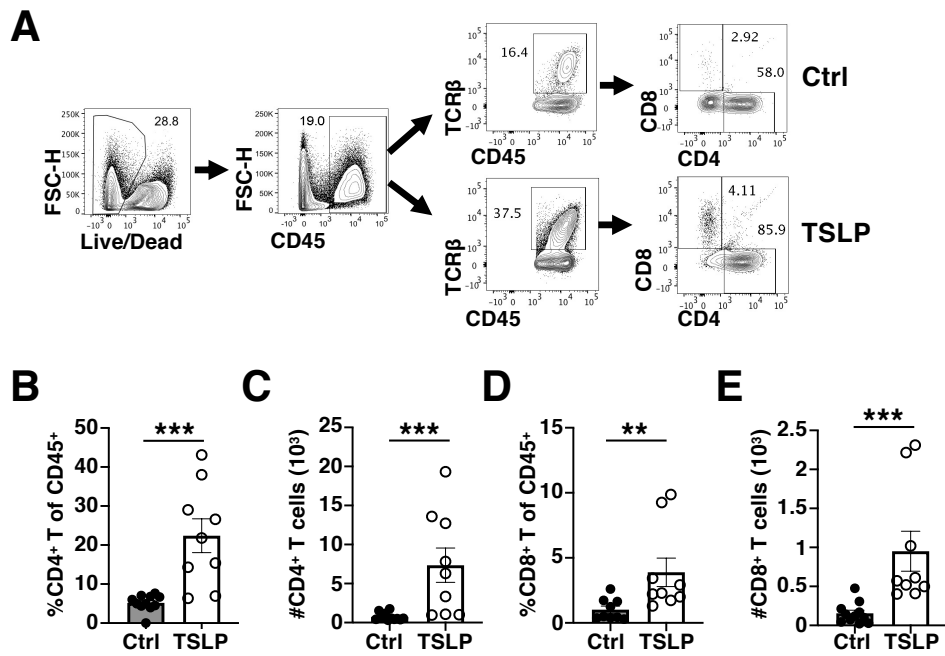

# Supplemental Fig. 12

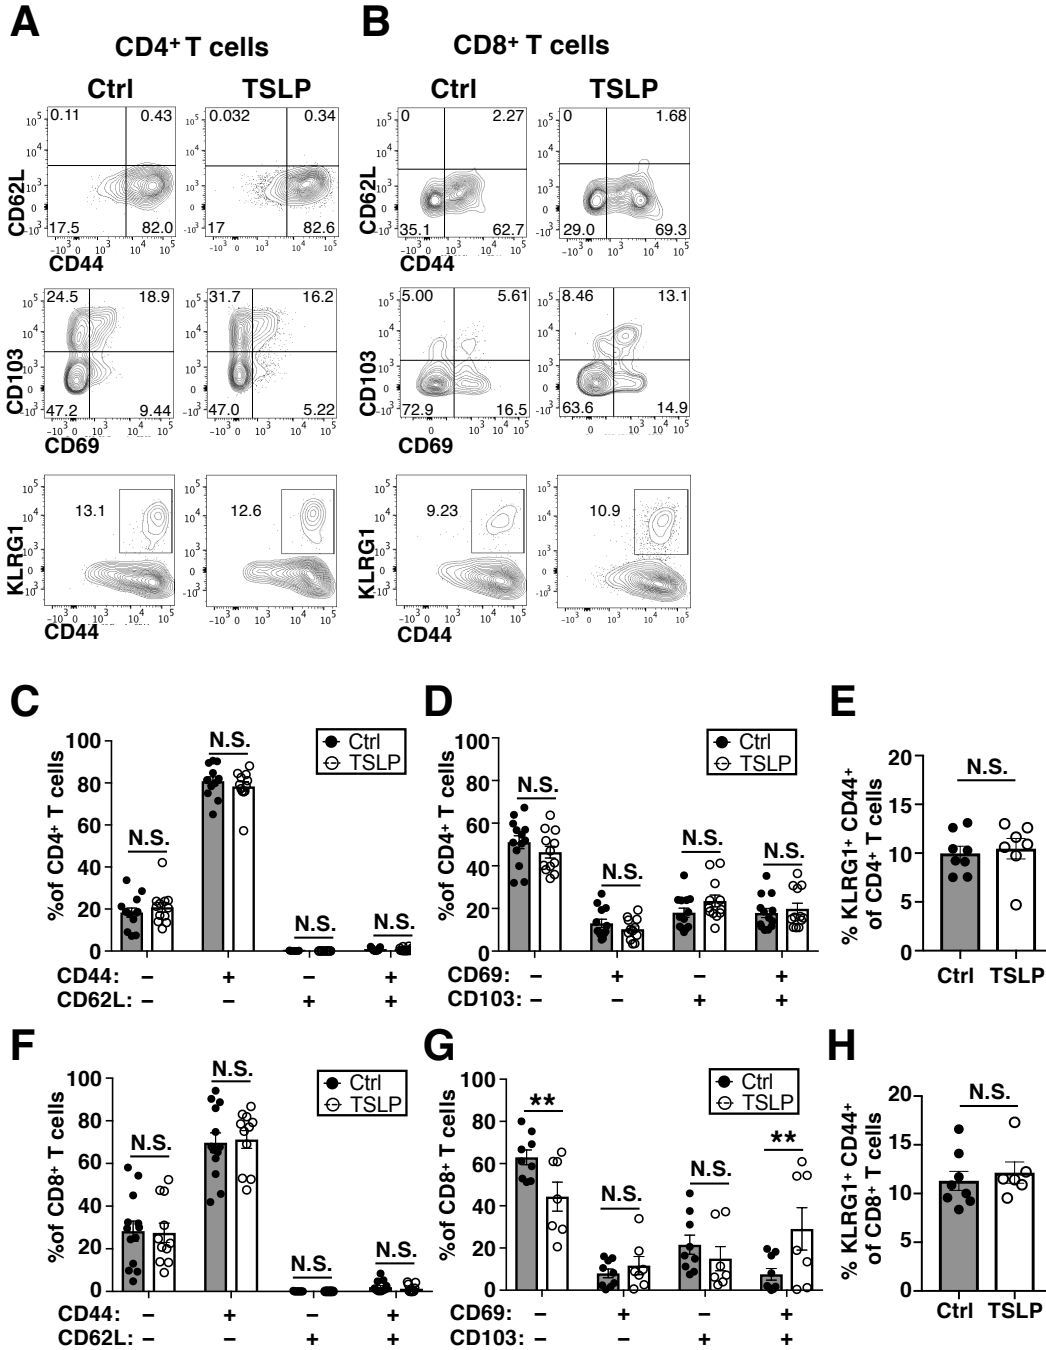



Supplemental Fig. 13

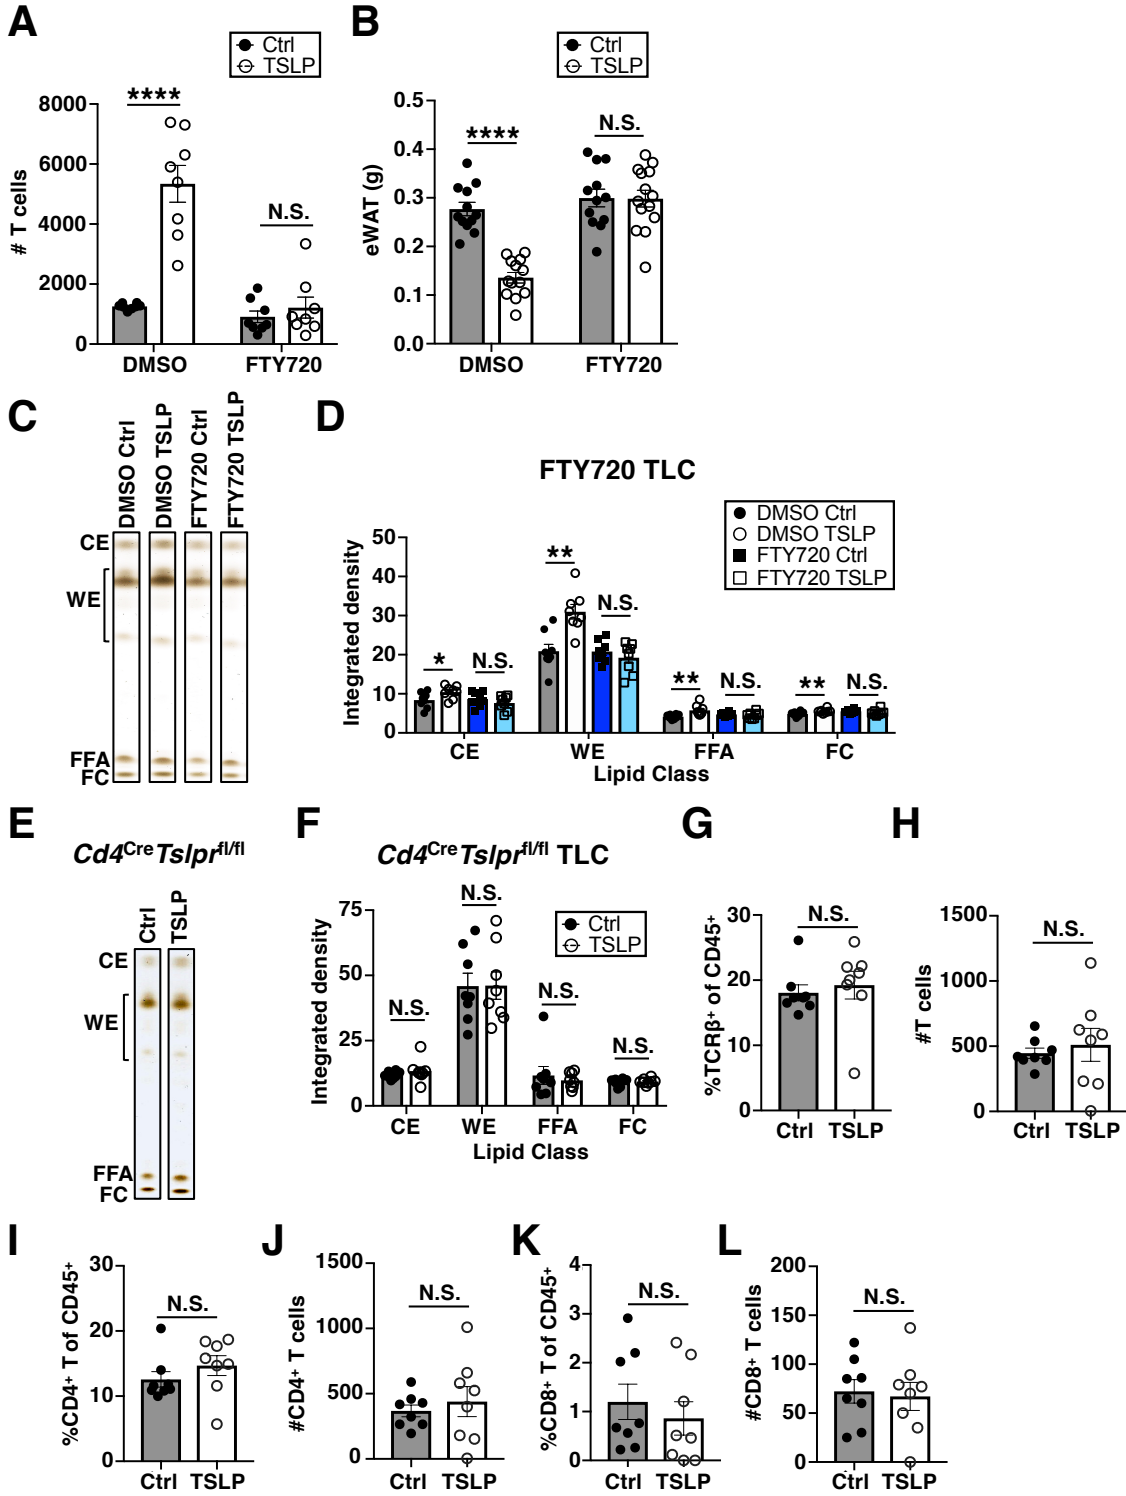

Supplemental Fig. 14

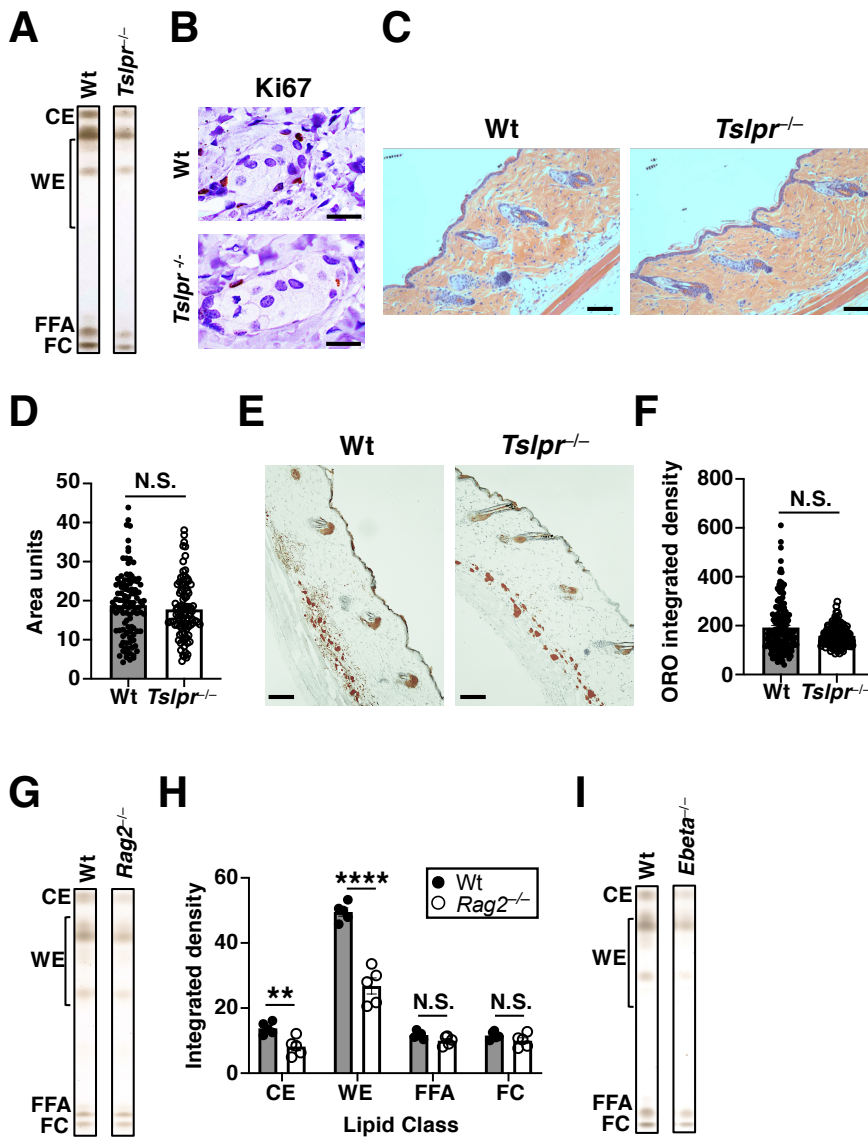

Supplementary Fig. 15

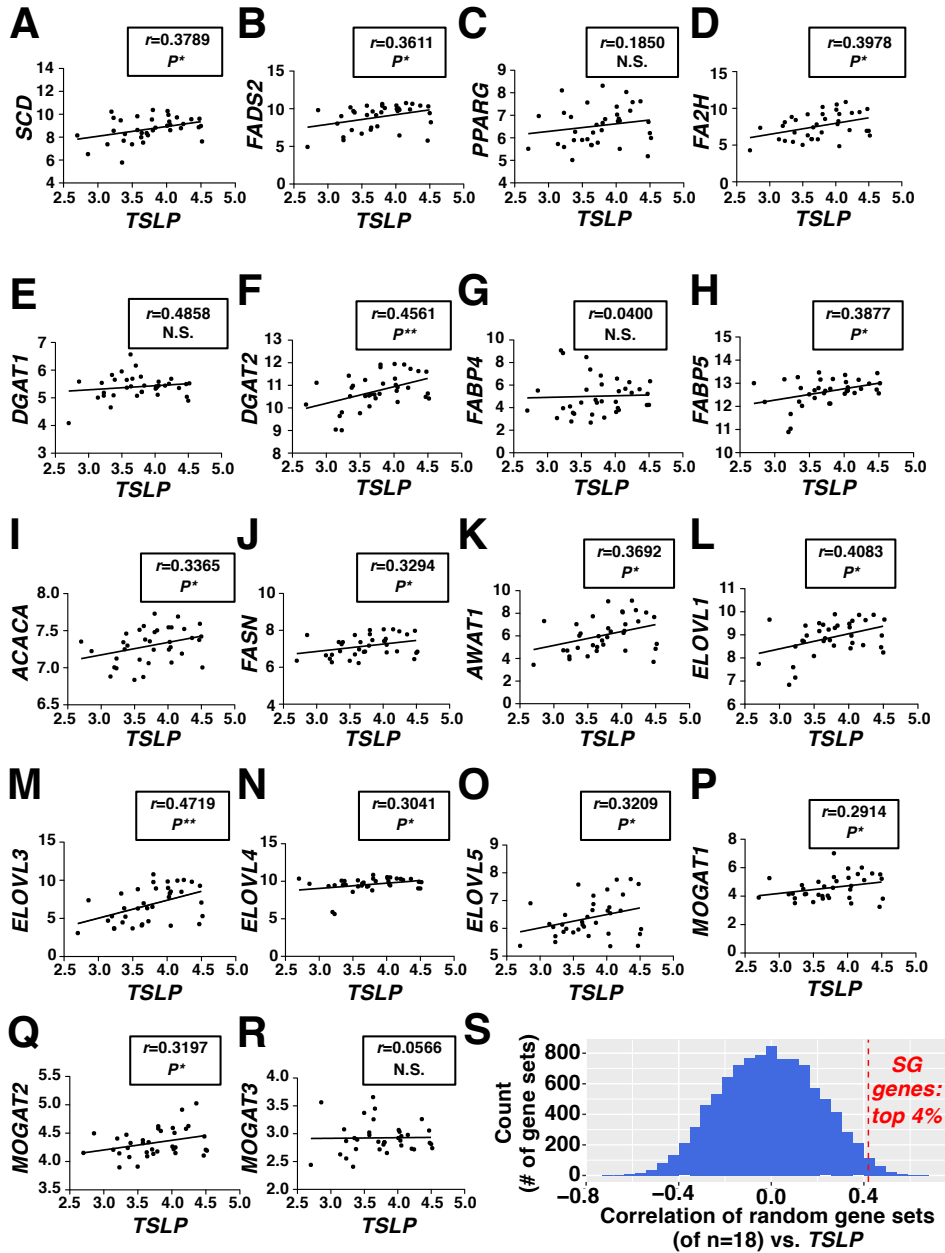

Supplement: NIHMS1779842-supplement-1.pdf [file NIHMS1779842-supplement-1.pdf]
