# Supplementary material
Source: PubMed Central journal article supplement (PMC8917823)
Supplement: NIHMS1779842-supplement-Supp_Tables.pdf [file NIHMS1779842-supplement-Supp_Tables.pdf]

| <b>Organ</b>           | <b>Pathology review of TSLP-AAV versus Ctrl-AAV-injected mice</b>                                                                                                                                                                                                                                                                                                                                                                                                                                                                                                                                                                                                                                                                                                                                                                                                                                        |
|------------------------|----------------------------------------------------------------------------------------------------------------------------------------------------------------------------------------------------------------------------------------------------------------------------------------------------------------------------------------------------------------------------------------------------------------------------------------------------------------------------------------------------------------------------------------------------------------------------------------------------------------------------------------------------------------------------------------------------------------------------------------------------------------------------------------------------------------------------------------------------------------------------------------------------------|
| <b>Lung</b>            | Moderate inflammation: H&E sections of the lung show inflammatory cuffing of the arteries and arterioles in mice given TSLP-AAV. The infiltrate consists mostly of lymphocytes and eosinophils, with rare giant cells. No arteritis or necrosis is present. Bronchioles show focal mild cuffing with lymphocytes and eosinophils. The lung parenchyma is relatively spared.                                                                                                                                                                                                                                                                                                                                                                                                                                                                                                                              |
| <b>Liver</b>           | Moderate inflammation: H&E sections of the liver show increased portal inflammation and cuffing of central venules in mice given TSLP-AAV. The inflammatory infiltrate consists mostly of lymphocytes and eosinophils. No plasma cells or granulomas are present. No arteritis or necrosis is present. There is no apparent bile duct injury. There are focal collections of approximately 10-20 lymphocytes scattered throughout the parenchyma. No steatosis is present.                                                                                                                                                                                                                                                                                                                                                                                                                               |
| <b>Kidney</b>          | No inflammation: There are no apparent differences between the mice. On light microscopy (H&E, PAS, and Jones methenamine silver), there are no glomerular changes including mesangial expansion or hypercellularity, endocapillary hypercellularity, segmental sclerosis, hyaline thrombi, or crescent formation. No global glomerulosclerosis is noted. No holes, spikes, or duplication are seen on silver stain, suggesting no immune complex deposition. Vessels show no arteriosclerosis or hyalinosis, and no vasculitis. No interstitial fibrosis or tubular atrophy is present. No acute tubular injury is seen. There are no casts. Immunofluorescence was performed on the formalin-fixed paraffin-embedded tissue following protease digestion for IgG, IgA, IgM, C3, C1q, and kappa and lambda light chains. No deposits are seen. There is no evidence of immune complex mediated disease. |
| <b>Small Intestine</b> | No inflammation: There are no apparent differences between the mice on H&E sections of the small intestine. No villus blunting is seen, and there are no apparent neutrophils in the lamina propria. Less than 1 intraepithelial lymphocyte is seen per 5 epithelial cells (normal range).                                                                                                                                                                                                                                                                                                                                                                                                                                                                                                                                                                                                               |
| <b>Colon</b>           | No inflammation: There are no apparent differences between the mice on H&E sections of the colon. No crypt distortion, cryptitis, or mucin depletion is present. Less than 1 intraepithelial lymphocyte is seen per 5 epithelial cells (normal range).                                                                                                                                                                                                                                                                                                                                                                                                                                                                                                                                                                                                                                                   |
| <b>Skin</b>            | Mild inflammation: H&E sections of the skin show no impaired barrier function. There is no hyperkeratosis or parakeratosis, epidermal acanthosis, spongiosis, or microvesicles. There is no increased infiltration of lymphocytes in the epidermis or dermis. However, the dermis contains scattered eosinophils in mice given TSLP-AAV. Small vessels in the deep dermis show mild cuffing with eosinophils and lymphocytes in mice given TSLP-AAV. No arteritis or necrosis is present.                                                                                                                                                                                                                                                                                                                                                                                                                |

**Table S1. Description of organ architecture and inflammation in mice given Ctrl- versus TSLP-AAV.** The histological findings presented in Fig. S3 are described for each organ including the lung, liver, kidney, small intestine, colon, and skin.

| Target             | Clone     | Fluorochrome | Company        | Catalogue # | Concentration  |
|--------------------|-----------|--------------|----------------|-------------|----------------|
| Mouse/human B220   | RA3-6B2   | PE-Cy7       | BioLegend      | 103222      | 1 $\mu$ g/ml   |
| Mouse CD3          | 17A2      | PerCP-Cy5.5  | BioLegend      | 100218      | 1 $\mu$ g/ml   |
| Mouse CD4          | GK1.5     | FITC         | BioLegend      | 100406      | 2.5 $\mu$ g/ml |
| Mouse CD4          | RM4-5     | FITC         | BioLegend      | 100510      | 2.5 $\mu$ g/ml |
| Mouse CD4          | RM4-5     | PerCP-Cy5.5  | eBioscience    | 45-0042-82  | 1 $\mu$ g/ml   |
| Mouse CD8 $\alpha$ | 53-6.7    | APC          | BioLegend      | 100712      | 1 $\mu$ g/ml   |
| Mouse CD8 $\alpha$ | 53-6.7    | BV421        | BioLegend      | 100753      | 1 $\mu$ g/ml   |
| Mouse/human CD11b  | M1/70     | PE-Cy7       | BioLegend      | 101215      | 1 $\mu$ g/ml   |
| Mouse CD11c        | N418      | PE-Cy7       | BioLegend      | 117318      | 1 $\mu$ g/ml   |
| Mouse CD16/CD32    | 2.4G2     | unconjugated | BD Biosciences | 553142      | 2.5 $\mu$ g/ml |
| Mouse CD19         | 6D5       | PE-Cy7       | BioLegend      | 115520      | 1 $\mu$ g/ml   |
| Mouse/human CD44   | IM7       | FITC         | BioLegend      | 103006      | 2.5 $\mu$ g/ml |
| Mouse CD45         | 30-F11    | BV605        | BioLegend      | 103155      | 1 $\mu$ g/ml   |
| Mouse CD45         | 30-F11    | BV711        | BioLegend      | 103147      | 1 $\mu$ g/ml   |
| Mouse CD45.1       | A20       | BV711        | BioLegend      | 110739      | 1 $\mu$ g/ml   |
| Mouse CD45.2       | 104       | AF700        | eBioscience    | 56-0454-82  | 1 $\mu$ g/ml   |
| Mouse CD62L        | MEL-14    | AF700        | BioLegend      | 104426      | 2.5 $\mu$ g/ml |
| Mouse CD62L        | MEL-14    | APC          | BioLegend      | 104412      | 1 $\mu$ g/ml   |
| Mouse CD69         | H1.2F3    | PerCP-Cy5.5  | BioLegend      | 104522      | 1 $\mu$ g/ml   |
| Mouse CD69         | H1.2F3    | PE-Cy7       | BioLegend      | 104512      | 1 $\mu$ g/ml   |
| Mouse CD90.2       | 53-2.1    | PerCP-Cy5.5  | BioLegend      | 140322      | 1 $\mu$ g/ml   |
| Mouse CD103        | 2E7       | BV605        | BioLegend      | 121433      | 1 $\mu$ g/ml   |
| Mouse CD103        | 2E7       | PE           | eBioscience    | 12-1031-82  | 1 $\mu$ g/ml   |
| Mouse/human KLRG1  | 2F1/KLRG1 | BV421        | BioLegend      | 138414      | 1 $\mu$ g/ml   |
| Mouse NK1.1        | PK136     | PE-Cy7       | BioLegend      | 108714      | 1 $\mu$ g/ml   |
| Mouse TCR $\beta$  | H57-597   | BV605        | BioLegend      | 109241      | 1 $\mu$ g/ml   |
| Mouse TCR $\beta$  | H57-597   | BV711        | BioLegend      | 109243      | 1 $\mu$ g/ml   |
| Mouse TCR $\beta$  | H57-597   | PE-Cy7       | BioLegend      | 109222      | 1 $\mu$ g/ml   |

**Table S2. Flow cytometry antibodies.** List of fluorophore-conjugated antibodies used for surface staining for flow cytometry and cell sorting.

| Target               | Host    | Clone    | Conj      | Company                   | Catalogue # | Concentration or dilution |
|----------------------|---------|----------|-----------|---------------------------|-------------|---------------------------|
| Mouse/rat/human CD3  | Rabbit  | CAL57    | unconj    | Abcam                     | ab237721    | 5.1 $\mu$ g/ml            |
| Mouse CD4            | Rabbit  | EPR195   | unconj    | Abcam                     | ab183685    | 1.8 $\mu$ g/ml            |
| Mouse CD8            | Rabbit  | D4W2Z    | unconj    | Cell Signaling Technology | 98941       | 1:200                     |
| Mouse/rat/human Ki67 | Rabbit  | SP6      | unconj    | Abcam                     | ab16667     | 5.1 $\mu$ g/ml            |
| Mouse/human Krt5     | Chicken | Poly9059 | unconj    | BioLegend                 | 905903      | 2.5 $\mu$ g/ml            |
| Human Krt79          | Rabbit  | Polycl   | unconj    | ThermoFisher              | PA5-46517   | 1 $\mu$ g/ml              |
| Chicken IgY          | Goat    | Polycl   | Alexa 488 | ThermoFisher              | A-11039     | 2.2 $\mu$ g/ml            |
| Rabbit IgG           | Goat    | Polycl   | Alexa 555 | ThermoFisher              | A-21428     | 2 $\mu$ g/ml              |

**Table S3. Immunohistochemistry antibodies.** List of antibodies used for immunohistochemical staining of tissue samples. Polycl: polyclonal. Conj: conjugation. Unconj: unconjugated.
